# Supplementary material for: Recovery of stem cell proliferation by low intensity vibration under simulated microgravity requires LINC complex
Source: PubMed Central journal article supplement (PMC6520402; doi:10.1038/s41526-019-0072-5), 2019-05-15
Supplement: 41526_2019_72_MOESM1_ESM.pdf [file 41526_2019_72_MOESM1_ESM.pdf]

# Supplementary information

## Recovery of stem cell proliferation by low intensity vibration under simulated microgravity requires intact LINC complex

Touchstone H<sup>1\*</sup>, Bryd R<sup>1\*</sup>, Loiate, S<sup>1</sup>, Thompson M<sup>1.</sup>, Kim S<sup>2</sup>, Puranam K<sup>2</sup>, Senthilnathan AN<sup>2</sup>, Pu S<sup>3</sup>, Beard R<sup>3</sup>, Rubin J<sup>2</sup>, Alwood J<sup>4</sup>, Oxford JT<sup>3</sup>, Uzer G<sup>1†</sup>

<sup>1</sup>Mechanical and Biomedical Engineering, Boise State University

<sup>2</sup> Department of Medicine, University of North Carolina Chapel Hill

<sup>3</sup> Biomolecular Research Center, Boise State University

<sup>4</sup> Space Biosciences Division, NASA-Ames Research Center

**\*Co-first authors, † Corresponding Author**

### Funding support:

NASA EPSCoR NNX15AK35A (GU), NSBRI PF04304 (GU), NASA ISGC NNX15AI04H (GU), NIH P20GM109095 (GU, JO)

Figure S1. Comparison of sMG effect on proliferation between confluent and non-confluent cultures.

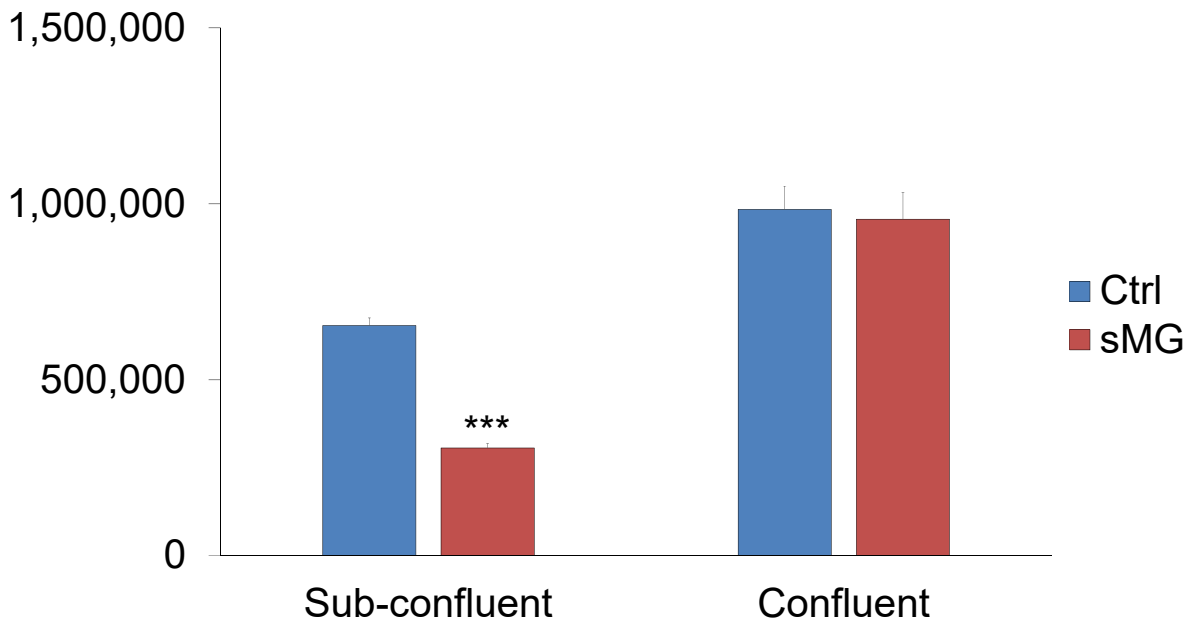

**Figure S1.** Comparison of sMG effect on proliferation between confluent and non-confluent cultures. 3 days of sMG decreased cell proliferation by 53% in non-confluent cultures (1,800cell/cm<sup>2</sup>,  $p < 0.001$ ,  $n = 3/\text{grp}$ ). There was no difference in cell proliferation when cells plated into confluent cultures (18,000 cell/cm<sup>2</sup>). Group comparisons were made using unpaired T-test (Figure 1b) \*  $p < 0.05$ , \*\*  $p < 0.01$ , \*\*\*  $p < 0.001$ , against control and each other.

Figure S2. F-actin morphology of sMG treated MSCs

F-actin (Phalloidin)

Nucleus (Hoechst 33342)

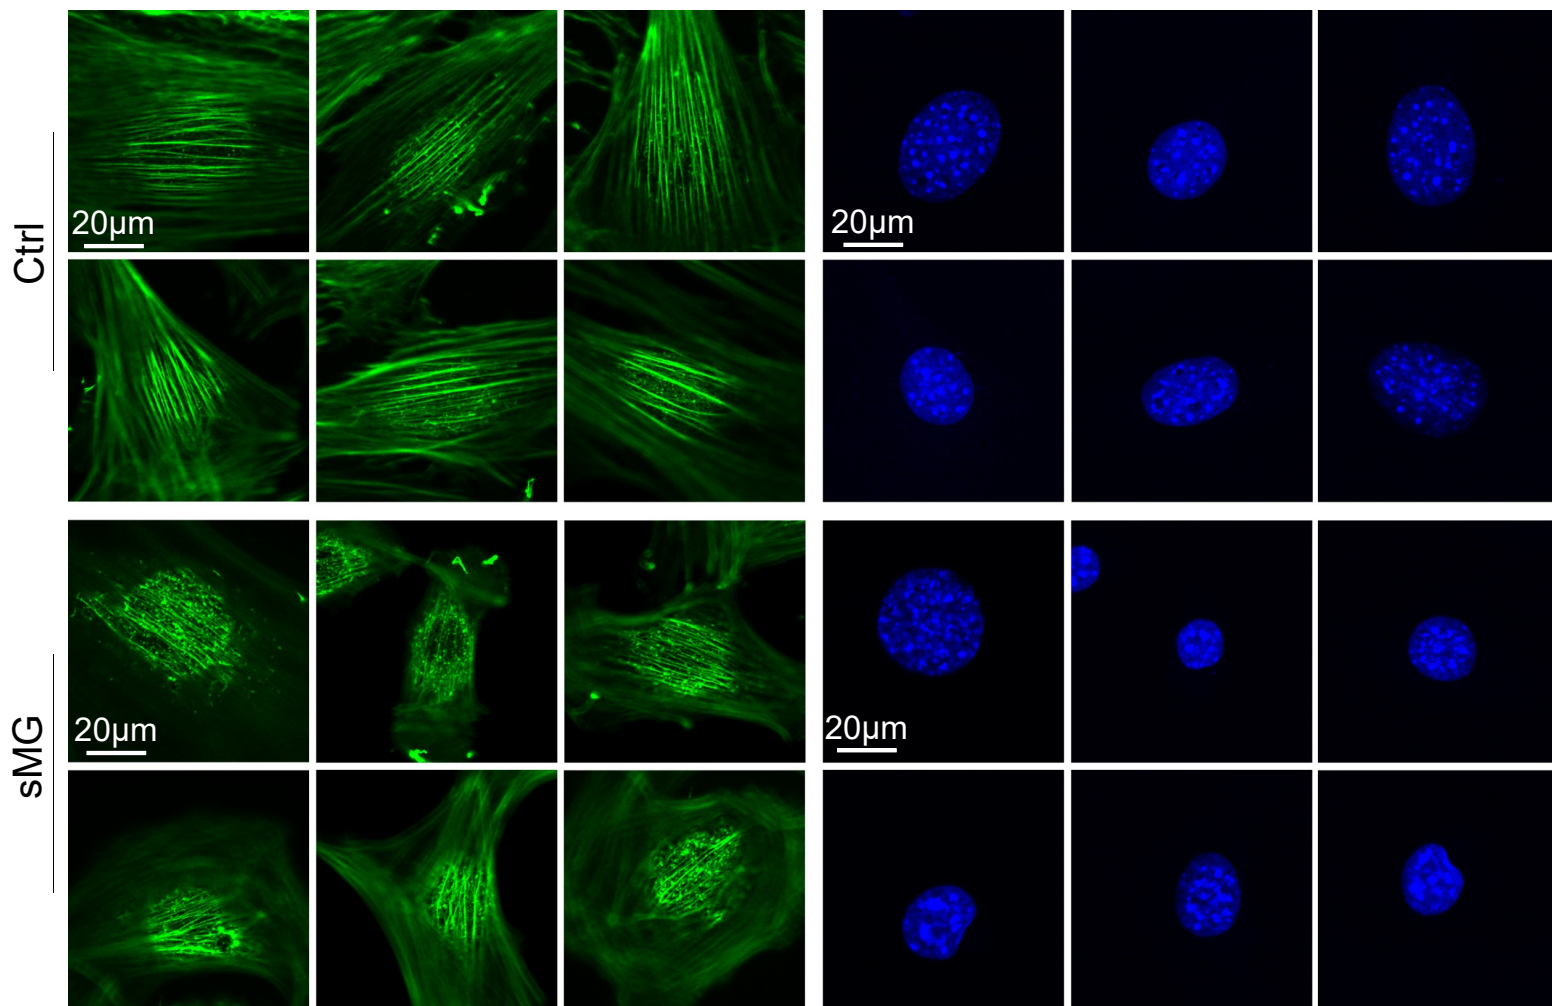

**Figure S2.** Representative images of actin morphology between control and sMG treated MSCs. Following sMG treatment, F-actin and nucleus were stained via Phalloidin ( Green) and Hoechst 33342 (Blue) and nuclear height was measured via confocal microscopy. Apical actin structure appeared disorganized in sMG groups.

Table.S1: Differences between Control, sMG, sMG+LIV as determined by proteomics

| Accession | Description                                                              | Group Comparisons<br>(fold of change) |       |             |                |                   |                    |
|-----------|--------------------------------------------------------------------------|---------------------------------------|-------|-------------|----------------|-------------------|--------------------|
|           |                                                                          | Normalized PSMs                       |       |             |                |                   |                    |
|           |                                                                          | Ctrl                                  | sMG   | sMG<br>+LIV | sMG<br>vs Ctrl | sMG+LIV<br>vs sMG | sMG+LIV<br>vs Ctrl |
| P46061    | Ran GTPase-activating protein                                            | 8.79                                  | 1.75  | 5.17        | 0.20           | 2.95              | 0.59               |
| P11440    | Cyclin-dependent kinase 1                                                | 7.33                                  | 1.75  | 1.72        | 0.24           | 0.98              | 0.24               |
| Q91YQ5    | Dolichyl-diphosphooligosaccharide--protein glycosyltransferase subunit 1 | 7.33                                  | 1.75  | 8.61        | 0.24           | 4.92              | 1.18               |
| Q99LT0    | Protein dpy-30 homolog                                                   | 7.33                                  | 1.75  | 3.44        | 0.24           | 1.97              | 0.47               |
| Q99LX0    | Protein/nucleic acid deglycase DJ-1                                      | 7.33                                  | 1.75  | 3.44        | 0.24           | 1.97              | 0.47               |
| O35639    | Annexin A3                                                               | 5.86                                  | 1.75  | 6.89        | 0.30           | 3.94              | 1.18               |
| P61089    | Ubiquitin-conjugating enzyme E2 N                                        | 5.86                                  | 1.75  | 3.44        | 0.30           | 1.97              | 0.59               |
| Q61699    | Isoform HSP105-beta of Heat shock protein 105 kDa                        | 5.86                                  | 1.75  | 3.44        | 0.30           | 1.97              | 0.59               |
| Q8R1F1    | Niban-like protein 1                                                     | 5.86                                  | 1.75  | 6.89        | 0.30           | 3.94              | 1.18               |
| Q9CPY7    | Isoform 2 of Cytosol aminopeptidase                                      | 5.86                                  | 1.75  | 6.89        | 0.30           | 3.94              | 1.18               |
| P99029    | Isoform Cytoplasmic+peroxisomal of Peroxiredoxin-5, mitochondrial        | 10.26                                 | 3.50  | 8.61        | 0.34           | 2.46              | 0.84               |
| P62960    | Nuclease-sensitive element-binding protein 1                             | 13.19                                 | 5.25  | 10.33       | 0.40           | 1.97              | 0.78               |
| P43275    | Histone H1.1                                                             | 8.79                                  | 3.50  | 10.33       | 0.40           | 2.95              | 1.18               |
| Q64152    | Isoform 2 of Transcription factor BTF3                                   | 8.79                                  | 3.50  | 3.44        | 0.40           | 0.98              | 0.39               |
| Q8BMS1    | Trifunctional enzyme subunit alpha, mitochondrial                        | 8.79                                  | 3.50  | 5.17        | 0.40           | 1.48              | 0.59               |
| Q9WTI7    | Isoform 2 of Unconventional myosin-1c                                    | 4.40                                  | 1.75  | 5.17        | 0.40           | 2.95              | 1.18               |
| Q9DCL9    | Multifunctional protein ADE2 OS=Mus musculus                             | 11.73                                 | 5.25  | 3.44        | 0.45           | 0.66              | 0.29               |
| P08228    | Superoxide dismutase [Cu-Zn] OS=Mus musculus                             | 7.33                                  | 3.50  | 1.72        | 0.48           | 0.49              | 0.24               |
| P56959    | RNA-binding protein FUS                                                  | 7.33                                  | 3.50  | 5.17        | 0.48           | 1.48              | 0.71               |
| Q6NZJ6    | Isoform 2 of Eukaryotic translation initiation factor 4 gamma 1          | 7.33                                  | 3.50  | 3.44        | 0.48           | 0.98              | 0.47               |
| Q921F2    | TAR DNA-binding protein 43                                               | 7.33                                  | 3.50  | 6.89        | 0.48           | 1.97              | 0.94               |
| Q9EQU5    | Isoform 2 of Protein SET                                                 | 7.33                                  | 3.50  | 5.17        | 0.48           | 1.48              | 0.71               |
| Q6ZQ38    | Cullin-associated NEDD8-dissociated protein 1                            | 17.59                                 | 10.49 | 5.17        | 0.60           | 0.49              | 0.29               |
| P17427    | AP-2 complex subunit alpha-2                                             | 2.93                                  | 1.75  | 5.17        | 0.60           | 2.95              | 1.76               |
| P52293    | Importin subunit alpha-1                                                 | 2.93                                  | 1.75  | 6.89        | 0.60           | 3.94              | 2.35               |
| P61161    | Actin-related protein 2                                                  | 10.26                                 | 7.00  | 3.44        | 0.68           | 0.49              | 0.34               |
| Q60865    | Caprin-1                                                                 | 8.79                                  | 7.00  | 1.72        | 0.80           | 0.25              | 0.20               |
| P34022    | Ran-specific GTPase-activating protein                                   | 4.40                                  | 3.50  | 8.61        | 0.80           | 2.46              | 1.96               |
| O35344    | Importin subunit alpha-4                                                 | 5.86                                  | 5.25  | 1.72        | 0.89           | 0.33              | 0.29               |
| Q9CQE8    | RNA transcription, translation and transport factor protein              | 5.86                                  | 5.25  | 1.72        | 0.89           | 0.33              | 0.29               |
| Q9D6Z1    | Nucleolar protein 56                                                     | 5.86                                  | 5.25  | 1.72        | 0.89           | 0.33              | 0.29               |
| P46935    | E3 ubiquitin-protein ligase NEDD4                                        | 7.33                                  | 7.00  | 3.44        | 0.95           | 0.49              | 0.47               |
| Q9ERK4    | Exportin-2                                                               | 8.79                                  | 10.49 | 5.17        | 1.19           | 0.49              | 0.59               |
| P23116    | Eukaryotic translation initiation factor 3 subunit A                     | 5.86                                  | 7.00  | 1.72        | 1.19           | 0.25              | 0.29               |
| P24369    | Peptidyl-prolyl cis-trans isomerase B                                    | 5.86                                  | 7.00  | 3.44        | 1.19           | 0.49              | 0.59               |
| Q9Z1Q5    | Chloride intracellular channel protein 1                                 | 5.86                                  | 7.00  | 3.44        | 1.19           | 0.49              | 0.59               |
| P08003    | Protein disulfide-isomerase A4                                           | 4.40                                  | 5.25  | 1.72        | 1.19           | 0.33              | 0.39               |
| P14733    | Lamin-B1                                                                 | 4.40                                  | 5.25  | 1.72        | 1.19           | 0.33              | 0.39               |
| P62849    | Isoform 2 of 40S ribosomal protein S24                                   | 4.40                                  | 5.25  | 1.72        | 1.19           | 0.33              | 0.39               |
| P63158    | High mobility group protein B1                                           | 4.40                                  | 5.25  | 1.72        | 1.19           | 0.33              | 0.39               |
| Q64514    | Isoform Short of Tripeptidyl-peptidase 2                                 | 4.40                                  | 5.25  | 1.72        | 1.19           | 0.33              | 0.39               |
| Q99L47    | Hsc70-interacting protein                                                | 4.40                                  | 5.25  | 1.72        | 1.19           | 0.33              | 0.39               |
| O35737    | Heterogeneous nuclear ribonucleoprotein H                                | 7.33                                  | 10.49 | 5.17        | 1.43           | 0.49              | 0.71               |
| Q60817    | Nascent polypeptide-associated complex subunit alpha                     | 7.33                                  | 10.49 | 5.17        | 1.43           | 0.49              | 0.71               |
| Q99PL5    | Ribosome-binding protein 1                                               | 7.33                                  | 10.49 | 5.17        | 1.43           | 0.49              | 0.71               |
| Q9R0N0    | Galactokinase                                                            | 7.33                                  | 10.49 | 5.17        | 1.43           | 0.49              | 0.71               |
| Q9JMH6    | Isoform 2 of Thioredoxin reductase 1, cytoplasmic                        | 14.66                                 | 20.99 | 10.33       | 1.43           | 0.49              | 0.71               |
| P11087    | Isoform 2 of Collagen alpha-1(I) chain                                   | 4.40                                  | 7.00  | 1.72        | 1.59           | 0.25              | 0.39               |
| Q9D819    | Inorganic pyrophosphatase                                                | 4.40                                  | 7.00  | 3.44        | 1.59           | 0.49              | 0.78               |
| P37889    | Isoform 2 of Fibulin-2                                                   | 5.86                                  | 10.49 | 5.17        | 1.79           | 0.49              | 0.88               |
| Q3THK7    | GMP synthase [glutamine-hydrolyzing]                                     | 2.93                                  | 5.25  | 1.72        | 1.79           | 0.33              | 0.59               |
| Q9QZE7    | Translin-associated protein X                                            | 2.93                                  | 5.25  | 1.72        | 1.79           | 0.33              | 0.59               |
| P47757    | Isoform 2 of F-actin-capping protein subunit beta                        | 10.26                                 | 19.24 | 8.61        | 1.88           | 0.45              | 0.84               |
| O09061    | Proteasome subunit beta type-1                                           | 4.40                                  | 8.74  | 1.72        | 1.99           | 0.20              | 0.39               |
| Q60716    | Isoform IIa of Prolyl 4-hydroxylase subunit alpha-2                      | 4.40                                  | 8.74  | 3.44        | 1.99           | 0.39              | 0.78               |
| Q9Z1Q9    | Valine--tRNA ligase                                                      | 11.73                                 | 24.48 | 10.33       | 2.09           | 0.42              | 0.88               |
| Q9CZD3    | Glycine--tRNA ligase                                                     | 5.86                                  | 13.99 | 6.89        | 2.39           | 0.49              | 1.18               |
| P62874    | Guanine nucleotide-binding protein G(I)/G(S)/G(T) subunit beta-1         | 2.93                                  | 7.00  | 3.44        | 2.39           | 0.49              | 1.18               |
| P10852    | 4F2 cell-surface antigen heavy chain                                     | 1.47                                  | 5.25  | 1.72        | 3.58           | 0.33              | 1.18               |
| P56655    | Cytochrome P450 2C38                                                     | 1.47                                  | 5.25  | 1.72        | 3.58           | 0.33              | 1.18               |
| Q9WUM4    | Coronin-1C                                                               | 1.47                                  | 5.25  | 1.72        | 3.58           | 0.33              | 1.18               |
| Q60715    | Prolyl 4-hydroxylase subunit alpha-1                                     | 2.93                                  | 13.99 | 6.89        | 4.77           | 0.49              | 2.35               |

**Table.S2** : Cell Culture and Pharmacological Reagents

| Cell Culture and Pharmacological Reagents |                     | Final Concentration |
|-------------------------------------------|---------------------|---------------------|
| IMDM                                      | GIBCO               | -                   |
| FCS                                       | Atlanta Biologicals | 10% v/v             |
| Penicillin/streptomycin                   | GIBCO               | 1% v/v              |

**Table.S3** : Antibodies used and their final concentrations for western blots

| Antibodies           |                          | Final Concentration |
|----------------------|--------------------------|---------------------|
| Akt (4685)           | Cell Signaling           | 1/2000              |
| p-Akt Ser473 (4058L) | Cell Signaling           | 1/1000              |
| LaminA/C (4C11)      | Cell Signaling           | 1/1000              |
| p-FAK Tyr397 (328 3) | Cell Signaling           | 1/1000              |
| FAK (sc-558)         | Santa Cruz Biotechnology | 1/500               |
| Lamin B1 (OAEB03011) | Aviva Systems Biology    | 1/1000              |
| Vinculin (4650T)     | Cell Signaling           | 1/500               |
| Sun-1 (HPA008346)    | Sigma Aldrich            | 1/1000              |
| Sun-2 (ab87036)      | Abcam                    | 1/1000              |
| GAPDH (5174S)        | Cell Signaling           | 1/1000              |
| YAP (14074S)         | Cell Signaling           | 1/1000              |

**Table.S4** : siRNA sequences

| siRNA Sequences -Stealth Select siRNAs (Invitrogen) |                                   |
|-----------------------------------------------------|-----------------------------------|
| siRNA SUN-1 Control                                 | 5'- GAAATCGAAGTACCTCGAGTGATAT -3' |
| siRNA SUN-1                                         | 5'- GAAAGGCTATGAATCCAGAGCTTAT-3'  |
| siRNA SUN-2 Control                                 | 5'-CACCAGAGGCTAGAACTCTTACTCA-3'   |
| siRNA SUN-2                                         | 5'-CACCAGAGGCTAGAACTCTTACTCA-3'   |

**Table.S5:** PCR Primers used

| PCR primers        |                              |
|--------------------|------------------------------|
| Sun-1 -Forward     | 5'-CATGAAGTGCGTCTCTCCAA-3'   |
| Sun-1 -Reverse     | 5'- CCTGCTTTCAGCTTGGTTTC-3'  |
| Sun-2 -Forward     | 5'-CAGCAACATGAAGCACCTGT-3'   |
| Sun-2 -Reverse     | 5'-GCTGCCGATGTAGGACTCTC-3'   |
| Lmna -Forward      | 5'- TGAGTACAACCTGCGCTCAC -3  |
| Lmna -Reverse      | 5'- TGTGACACTGGAGGCAGAAG     |
| Nesprin1G -Forward | 5'-AAGCAACTCAAGGCTTTCCA-3'   |
| Nesprin1G -Reverse | 5'-GTCTGAGCTCGTCCAGTTCC-3'   |
| Nesprin2G -Forward | 5'- ACCTCGCCAACACATACCTC-3', |
| Nesprin2G -Reverse | 5'- TGCTTCTTGCTGCTTCTTCA-3'  |
| 18S -Forward       | 5'-GAACGTCTGCCCTATCAACT-3'   |
| 18S -Reverse       | 5'-CCAAGATCCAACACTACGAGCT-3  |

**Table.S6:** Immunostaining antibodies and reagents and their final concentrations

| Immunostaining antibodies and Reagents |                   | Final Concentration |
|----------------------------------------|-------------------|---------------------|
| Hoechst 33342                          | Invitrogen        | 1 µg/mL             |
| Alexa Fluor 488 Phalloidin             | Life Technologies | 0.1µM               |

# Figure S3 Unprocessed Blots

Fig 5 – Lamin A/C

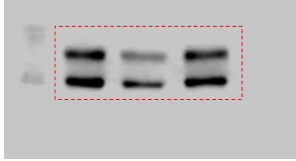

Fig 5 – pFAK

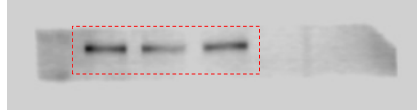

Fig 4 – Lamin A/C

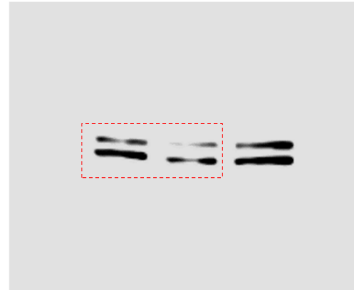

Fig 3 – YAP

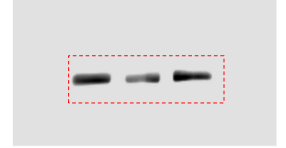

Fig 5 – Sun-1

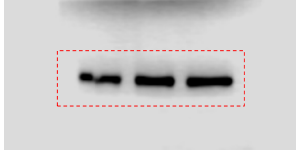

Fig 5 – TFAK

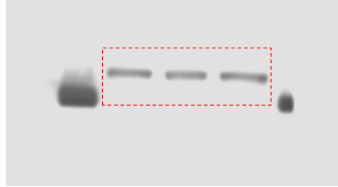

Fig 3 – GAPDH

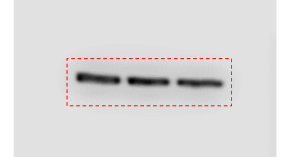

Fig 5 – LmnB

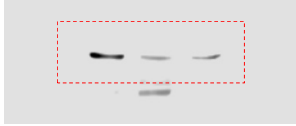

Fig 5 – GAPDH

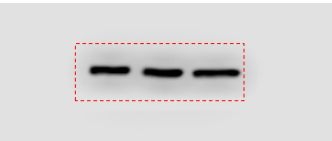

Fig 4 – Sun-1

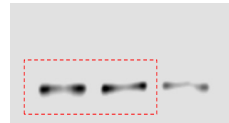

Fig 5 – Sun-2

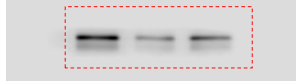

Fig 4 – Sun-2

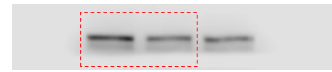

Fig 5 – GAPDH

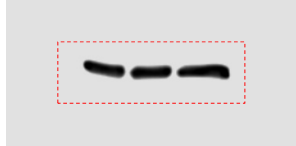

Fig 5 – Vinculin

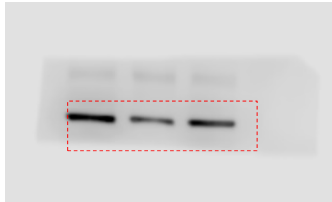

Fig 4 – Sun-1

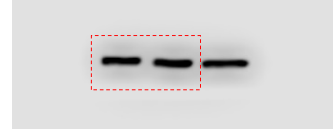

Fig 4 – pAkt

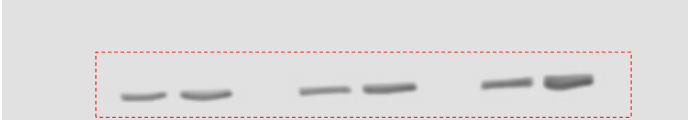

Fig 4 – tAkt

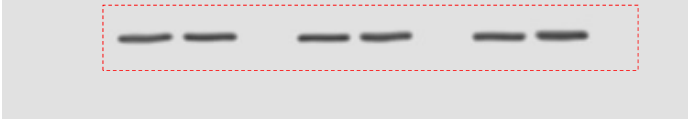

**Figure S3.** Unprocessed blots as obtained by LiCor C-DiGit blot scanner.
